# Supplementary material for: The relationship between PM2.5 and anti-cyclone wave activity during summer over the United States
Source: Copernicus journal article supplement (doi:10.5194/acp-2021-750), 2021-10-12
Supplement: Supplementary file 1 [file Table S1. The descriptions of the 150 observational sites used in this study are included in the online supplement.xlsx]

## Sheet: Observational stations
Site	Code	State	Latitude	Longitude	Elevation	StartDate	EndDate	Number of observations
Acadia NP	ACAD1	ME	44.3771	-68.261	157	198803	201412	3050
Addison Pinnacle	ADPI1	NY	42.0912	-77.2099	512	200104	201006	1125
Agua Tibia	AGTI1	CA	33.4636	-116.971	507	200011	201412	1709
Arendtsville	AREN1	PA	39.9232	-77.3079	267	200104	201012	1187
Badlands NP	BADL1	SD	43.7435	-101.941	736	198803	201412	3050
Mount Baldy	BALD1	AZ	34.0584	-109.441	2508	200002	201412	1798
Bandelier NM	BAND1	NM	35.7797	-106.266	1988	198803	201412	3051
Big Bend NP	BIBE1	TX	29.3027	-103.178	1066	198803	201412	3051
North Birmingham	BIRM1	AL	33.5531	-86.8148	175	200404	201412	1320
Bliss SP (TRPA)	BLIS1	CA	38.9761	-120.103	2130	199011	201412	2768
Blue Mounds	BLMO1	MN	43.7158	-96.1913	473	200207	201412	1533
Bosque del Apache	BOAP1	NM	33.8695	-106.852	1389	200004	201412	1785
Bondville	BOND1	IL	40.052	-88.3733	263	200103	201412	1683
Boundary Waters Canoe Area	BOWA1	MN	47.9466	-91.4955	526	199108	201412	2690
Bryce Canyon NP	BRCA1	UT	37.6184	-112.174	2481	198803	201412	3051
Bridger Wilderness	BRID1	WY	42.9749	-109.758	2626	198803	201412	3051
Brigantine NWR	BRIG1	NJ	39.465	-74.4492	5	199109	201412	2680
Brooklyn Lake	BRLA1	WY	41.3662	-106.242	3196	199309	200401	1156
Bridgton	BRMA1	ME	44.1074	-70.7292	233	200103	201412	1681
Casco Bay	CABA1	ME	43.8325	-70.0644	26	200103	201412	1681
Cabinet Mountains	CABI1	MT	47.9549	-115.671	1441	200007	201412	1757
Cape Cod	CACO1	MA	41.9758	-70.0242	49	200104	201412	1674
Caney Creek	CACR1	AR	34.4544	-94.1429	683	200006	201412	1765
Cadiz	CADI1	KY	36.7842	-87.8501	191	200103	201012	1196
Canyonlands NP	CANY1	UT	38.4587	-109.821	1798	198803	201412	3051
Capitol Reef NP	CAPI1	UT	38.3022	-111.293	1896	200003	201412	1785
Cedar Bluff	CEBL1	KS	38.7701	-99.7634	665	200206	201412	1533
Chassahowitzka NWR	CHAS1	FL	28.7484	-82.5549	4	199304	201412	2520
Chiricahua NM	CHIR1	AZ	32.0094	-109.389	1554	198803	201412	3051
Cloud Peak	CLPE1	WY	44.3335	-106.957	2470	200206	201412	1533
Columbia Gorge #1	COGO1	WA	45.5693	-122.21	230	199609	201110	1647
Cohutta	COHU1	GA	34.7852	-84.6265	735	200005	201412	1771
Columbia River Gorge	CORI1	WA	45.6644	-121.001	178	199306	201412	2496
Crescent Lake	CRES1	NE	41.7627	-102.434	1207	200207	201412	1533
Crater Lake NP	CRLA1	OR	42.8958	-122.136	1996	198803	201412	3051
Craters of the Moon NM	CRMO1	ID	43.4605	-113.555	1817	199205	201412	2612
Detroit	DETR1	MI	42.2286	-83.2085	179	200311	201412	1007
Dome Lands Wilderness	DOME1	CA	35.7278	-118.138	927	200002	201412	1737
Dolly Sods Wilderness	DOSO1	WV	39.1053	-79.4261	1182	199109	201412	2678
Douglas	DOUG1	AZ	31.3492	-109.54	1230	200406	201412	1289
El Dorado Springs	ELDO1	MO	37.7009	-94.0348	297	200206	201412	1563
Ellis	ELLI1	OK	36.0853	-99.9354	697	200206	201412	1563
Everglades NP	EVER1	FL	25.391	-80.6806	1	198809	201412	2946
Flathead	FLAT1	MT	47.7734	-114.269	1580	200206	201412	1533
Fort Peck	FOPE1	MT	48.308	-105.102	638	200206	201412	1533
Fresno	FRES1	CA	36.7818	-119.773	100	200409	201412	1258
Frostberg Reservoir (Big Piney Run)	FRRE1	MD	39.7058	-79.0122	767	200404	201412	1320
Gates of the Mountains	GAMO1	MT	46.8262	-111.711	2387	200007	201412	1756
Gila Wilderness	GICL1	NM	33.2204	-108.235	1775	199404	201412	2410
Glacier NP	GLAC1	MT	48.5105	-113.997	975	198803	201412	3050
Great Basin NP	GRBA1	NV	39.0052	-114.216	2065	199205	201412	2608
Hopi Point #1	GRCA1	AZ	36.0658	-112.154	2164	198803	199912	1226
Hance Camp at Grand Canyon NP	GRCA2	AZ	35.9731	-111.984	2267	199709	201412	2050
Great Gulf Wilderness	GRGU1	NH	44.3082	-71.2177	453	199506	201412	2247
Great River Bluffs	GRRI1	MN	43.9373	-91.4052	370	200207	201412	1533
Great Sand Dunes NM	GRSA1	CO	37.7249	-105.519	2498	198805	201412	3033
Great Smoky Mountains NP	GRSM1	TN	35.6334	-83.9416	810	198803	201412	3050
Guadalupe Mountains NP	GUMO1	TX	31.833	-104.809	1672	198803	201412	3051
Hells Canyon	HECA1	OR	44.9702	-116.844	655	200008	201412	1745
Hercules-Glades	HEGL1	MO	36.6138	-92.9221	404	200103	201412	1685
Hoover	HOOV1	CA	38.0881	-119.177	2560	200107	201412	1648
Ike's Backbone	IKBA1	AZ	34.3405	-111.683	1297	200004	201412	1790
Indian Gardens	INGA1	AZ	36.0778	-112.129	1166	198910	201305	2665
Isle Royale NP	ISLE1	MI	47.4596	-88.1491	182	199911	201412	1828
Jarbidge Wilderness	JARB1	NV	41.8926	-115.426	1869	198803	201412	3050
James River Face Wilderness	JARI1	VA	37.6266	-79.5125	289	200006	201412	1771
Joshua Tree NP	JOSH1	CA	34.0695	-116.389	1235	200002	201412	1799
Kaiser	KAIS1	CA	37.2207	-119.155	2597	200001	201412	1747
Kalmiopsis	KALM1	OR	42.552	-124.059	80	200003	201412	1796
Lava Beds NM	LABE1	CA	41.7117	-121.507	1459	200003	201412	1790
Lake Sugema	LASU2	IA	40.6932	-92.0059	229	200412	201412	1228
Lassen Volcanic NP	LAVO1	CA	40.5398	-121.577	1732	198803	201412	3050
Linville Gorge	LIGO1	NC	35.9723	-81.9331	968	200003	201412	1789
Livonia	LIVO1	IN	38.5346	-86.2604	281	200103	201012	1196
Lostwood	LOST1	ND	48.6419	-102.402	696	199912	201412	1820
Lye Brook Wilderness	LYBR1	VT	43.1482	-73.1268	1015	199109	201209	2405
Mammoth Cave NP	MACA1	KY	37.1318	-86.1479	235	199109	201412	2684
Martha's Vineyard	MAVI1	MA	41.3309	-70.7846	2	200301	201412	1472
Meadview	MEAD1	AZ	36.0193	-114.068	902	199109	201412	1611
Medicine Lake	MELA1	MT	48.4871	-104.476	606	199912	201412	1820
Mesa Verde NP	MEVE1	CO	37.1984	-108.491	2172	198803	201412	3050
Mingo	MING1	MO	36.9717	-90.1432	111	200005	201412	1771
M.K. Goddard	MKGO1	PA	41.4269	-80.1453	379	200104	201012	1187
Mount Hood	MOHO1	OR	45.2888	-121.784	1531	200003	201412	1795
Mohawk Mt.	MOMO1	CT	41.8214	-73.2973	521	200109	201412	1620
Monture	MONT1	MT	47.1222	-113.154	1282	200003	201412	1791
Moosehorn NWR	MOOS1	ME	45.1259	-67.2661	77	199412	201412	2344
Mount Rainier NP	MORA1	WA	46.7583	-122.124	439	198803	201412	3051
Mount Zirkel Wilderness	MOZI1	CO	40.5383	-106.677	3243	199407	201412	2381
Nebraska NF	NEBR1	NE	41.8888	-100.339	883	200207	201412	1533
North Absaroka	NOAB1	WY	44.7448	-109.382	2482	200001	201412	1799
North Cascades	NOCA1	WA	48.7316	-121.065	568	200003	201412	1874
Northern Cheyenne	NOCH1	MT	45.6495	-106.557	1283	200206	201412	1533
Okefenokee NWR	OKEF1	GA	30.7405	-82.1283	48	199109	201412	2677
Olympic	OLYM1	WA	48.0065	-122.973	599	200107	201412	1641
Organ Pipe	ORPI1	AZ	31.9506	-112.802	504	200301	201412	1472
Pasayten	PASA1	WA	48.3877	-119.927	1627	200011	201412	1703
Petrified Forest NP	PEFO1	AZ	35.0777	-109.769	1766	198803	201412	3051
Penobscot	PENO1	ME	44.948	-68.6479	45	200601	201412	1093
Pinnacles NM	PINN1	CA	36.4833	-121.157	302	198803	201412	3050
Proctor Maple R. F.	PMRF1	VT	44.5284	-72.8688	401	199312	201412	1897
Presque Isle	PRIS1	ME	46.6964	-68.0333	165	200103	201412	1683
Puget Sound	PUSO1	WA	47.5696	-122.312	97	199603	201412	1990
Quaker City	QUCI1	OH	39.9428	-81.3378	366	200105	201412	1674
Quabbin Summit	QURE1	MA	42.2985	-72.3346	317	200103	201412	1674
Queen Valley	QUVA1	AZ	33.2939	-111.286	661	200104	201412	1669
San Rafael	RAFA1	CA	34.7339	-120.007	956	200002	201412	1806
Redwood NP	REDW1	CA	41.5608	-124.084	243	198803	201412	3051
Cape Romain NWR	ROMA1	SC	32.941	-79.6572	4	199409	201412	2371
Rocky Mountain NP	ROMO1	CO	40.2783	-105.546	2760	199009	201412	2784
Salt Creek	SACR1	NM	33.4598	-104.404	1072	200004	201412	1783
Sac and Fox	SAFO1	KS	39.9791	-95.5682	293	200206	201106	1106
San Gabriel	SAGA1	CA	34.2969	-118.028	1791	200012	201412	1355
San Gorgonio Wilderness	SAGO1	CA	34.1939	-116.913	1726	198803	201412	3050
Saguaro NM	SAGU1	AZ	32.1746	-110.737	941	198806	201412	2318
St. Marks	SAMA1	FL	30.0926	-84.1614	7	200006	201412	1751
San Pedro Parks	SAPE1	NM	36.0139	-106.845	2935	200008	201412	1751
Saguaro West	SAWE1	AZ	32.2486	-111.218	714	200104	201412	1604
Sawtooth NF	SAWT1	ID	44.1705	-114.927	1990	199401	201412	2434
Seney	SENE1	MI	46.2889	-85.9503	214	199911	201412	1828
Sequoia NP	SEQU1	CA	36.4894	-118.829	519	199203	201412	2633
Shining Rock Wilderness	SHRO1	NC	35.3937	-82.7744	1617	199407	201412	2384
Sierra Ancha	SIAN1	AZ	34.0908	-110.942	1600	200002	201412	1804
Sikes	SIKE1	LA	32.0574	-92.435	45	200103	201012	1198
Sipsey Wilderness	SIPS1	AL	34.3433	-87.3388	286	199203	201412	2631
Snoqualmie Pass	SNPA1	WA	47.422	-121.426	1049	199307	201412	2481
Starkey	STAR1	OR	45.2249	-118.513	1259	200003	201412	1794
Sula Peak	SULA1	MT	45.8598	-114	1895	199408	201412	2378
Swanquarter	SWAN1	NC	35.451	-76.2075	-3	200006	201412	1769
Sycamore Canyon	SYCA1	AZ	35.1406	-111.969	2046	199109	201412	1923
Tallgrass	TALL1	KS	38.4341	-96.5602	390	200209	201412	1502
Thunder Basin	THBA1	WY	44.6634	-105.287	1195	200206	201412	1533
Theodore Roosevelt	THRO1	ND	46.8948	-103.378	852	199912	201412	1820
Three Sisters Wilderness	THSI1	OR	44.291	-122.043	885	199307	201412	2488
Tonto NM	TONT1	AZ	33.6548	-111.107	775	198804	201412	3035
Trinity	TRIN1	CA	40.7864	-122.805	1014	200007	201412	1730
UL Bend	ULBE1	MT	47.5823	-108.72	891	200001	201412	1808
Upper Buffalo Wilderness	UPBU1	AR	35.8258	-93.203	722	199112	201412	2654
Viking Lake	VILA1	IA	40.969	-95.045	371	200206	201412	1541
Washington D.C.	WASH1	DC	38.8762	-77.0344	15	198803	201412	3050
Weminuche Wilderness	WEMI1	CO	37.6594	-107.8	2750	198803	201412	3050
White Mountain	WHIT1	NM	33.4687	-105.535	2063	200201	201412	1593
White Pass	WHPA1	WA	46.6243	-121.388	1827	200002	201412	1803
Wheeler Peak	WHPE1	NM	36.5854	-105.452	3366	200008	201412	1751
White River NF	WHRI1	CO	39.1536	-106.821	3413	199307	201412	2489
Wind Cave	WICA1	SD	43.5576	-103.484	1296	199912	201412	1818
Wichita Mountains	WIMO1	OK	34.7323	-98.713	509	200103	201412	1685
Yellowstone NP 2	YELL2	WY	44.5653	-110.4	2425	199607	201412	3047
Yosemite NP	YOSE1	CA	37.7133	-119.706	1603	198803	201412	3049
Zion Canyon	ZICA1	UT	37.1983	-113.151	1215	200212	201412	1472
